# Supplementary material for: Compromised C3b-VSIG4 axis between decidual NK cells and macrophages contributes to recurrent spontaneous abortion
Source: PubMed Central journal article supplement — J Transl Med. 2024 Nov 11;22:1017. doi: 10.1186/s12967-024-05829-w (PMC11556194; doi:10.1186/s12967-024-05829-w), 2024-11-11
Supplement: 12967_2024_5829_MOESM1_ESM.pdf [file 12967_2024_5829_MOESM1_ESM.pdf]

**A****Ctrl-1**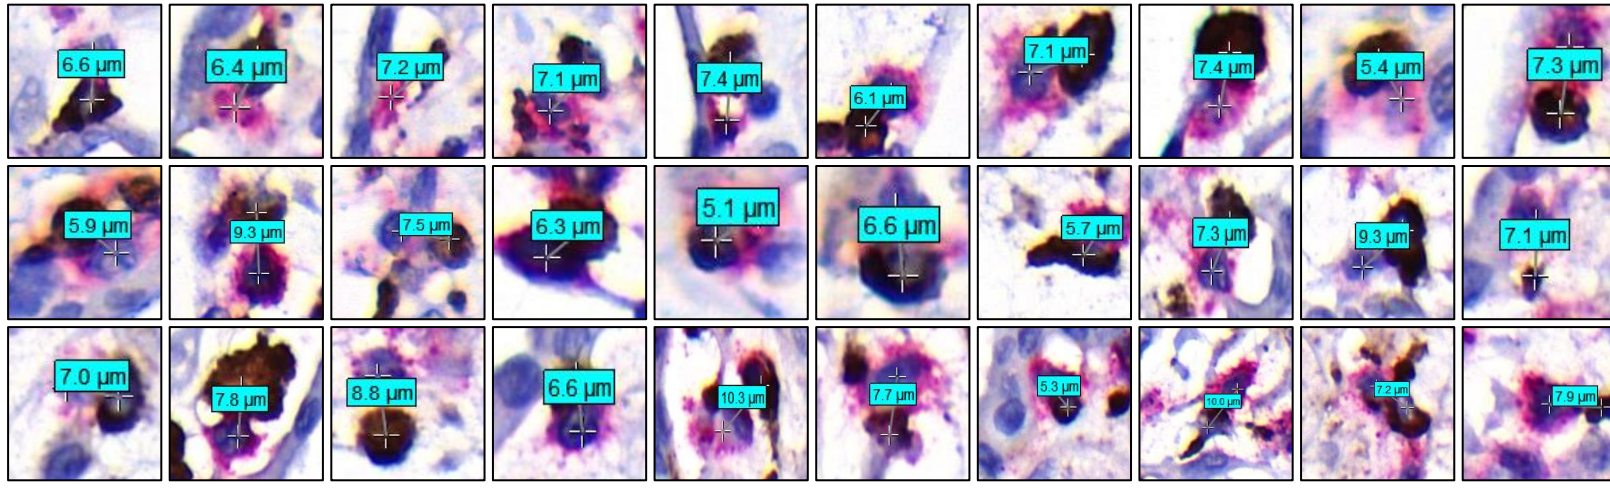**Ctrl-2**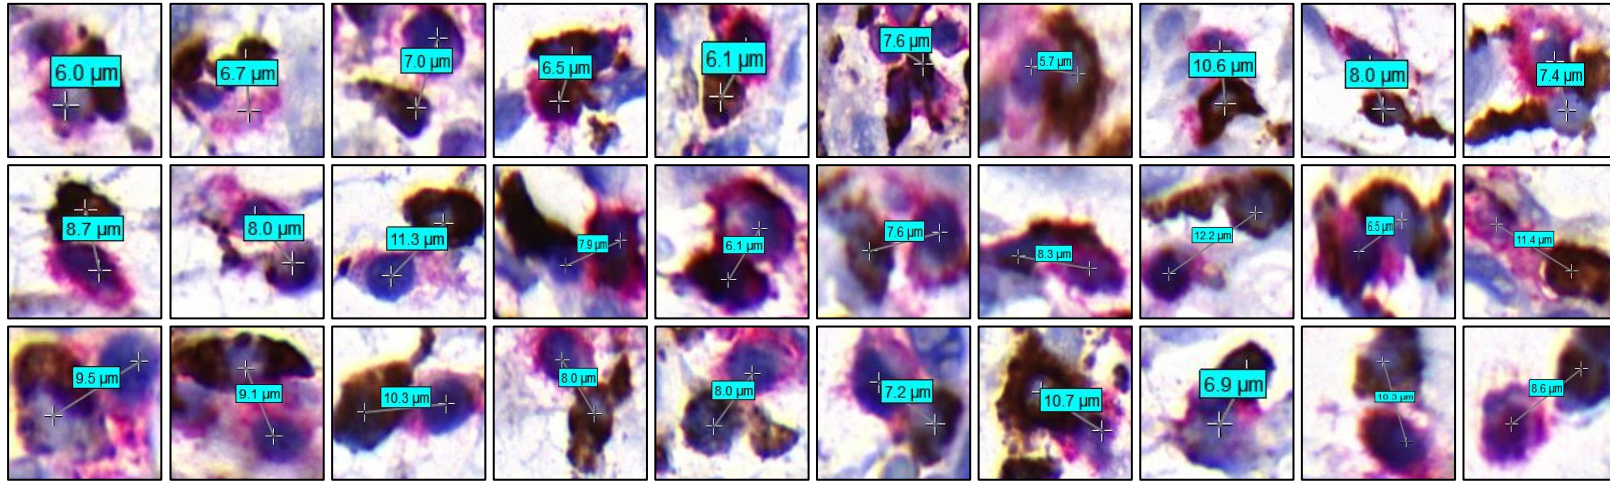**Ctrl-3**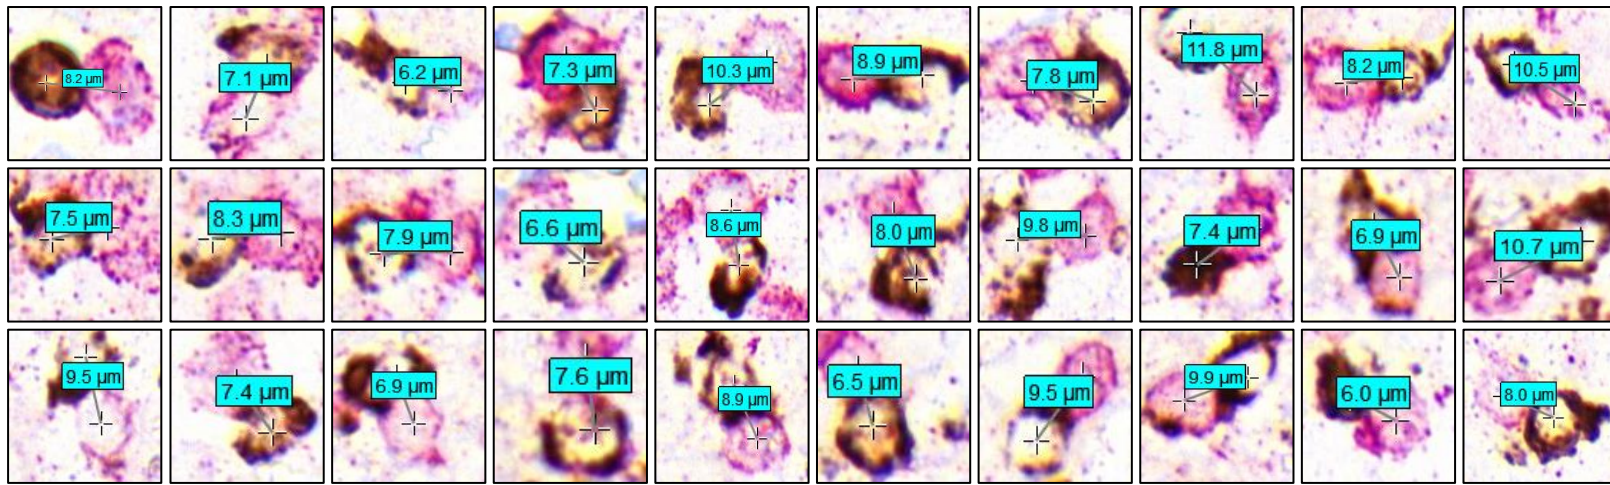**B****RSA-1**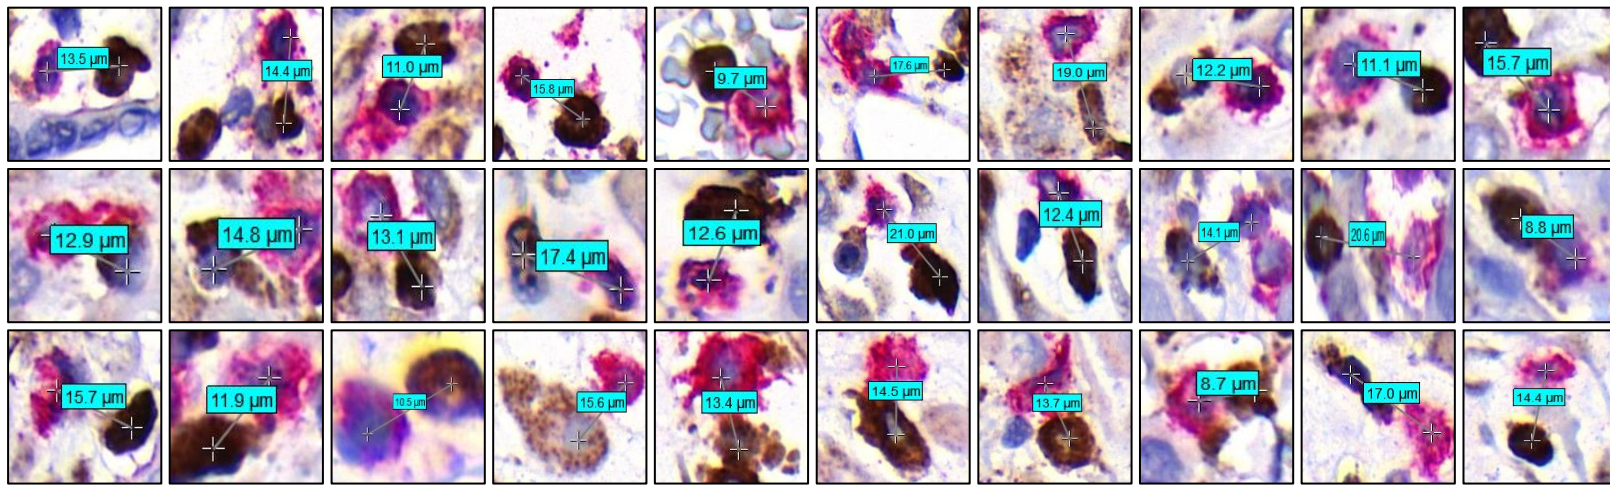**RSA-2**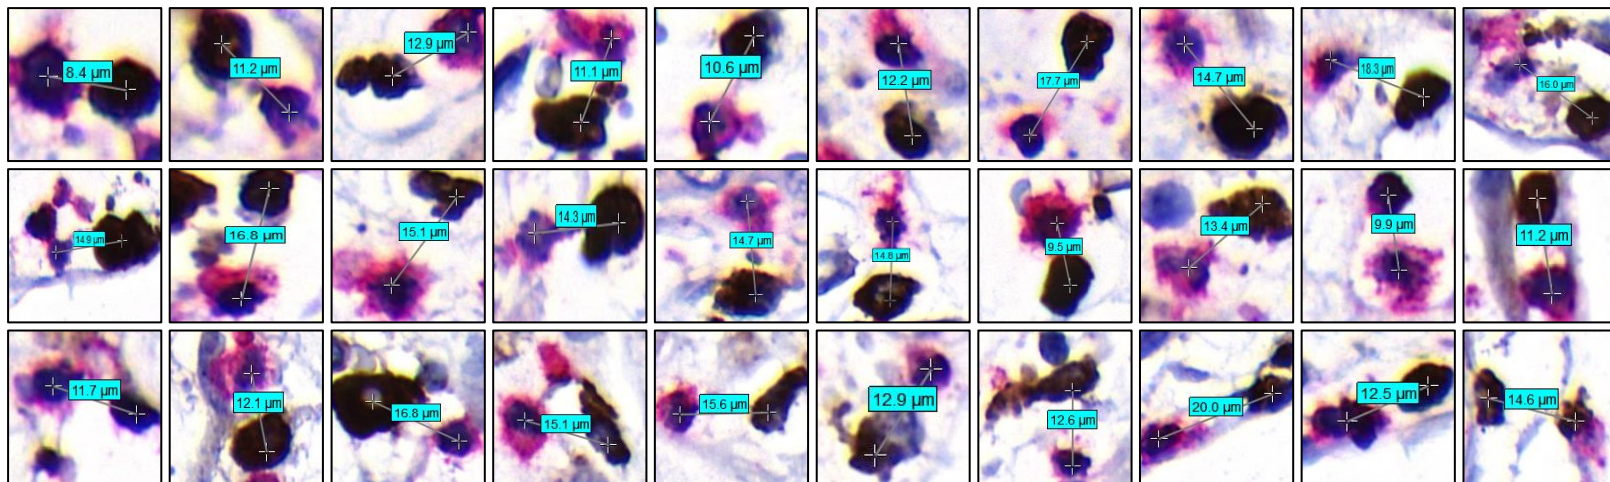**RSA-3**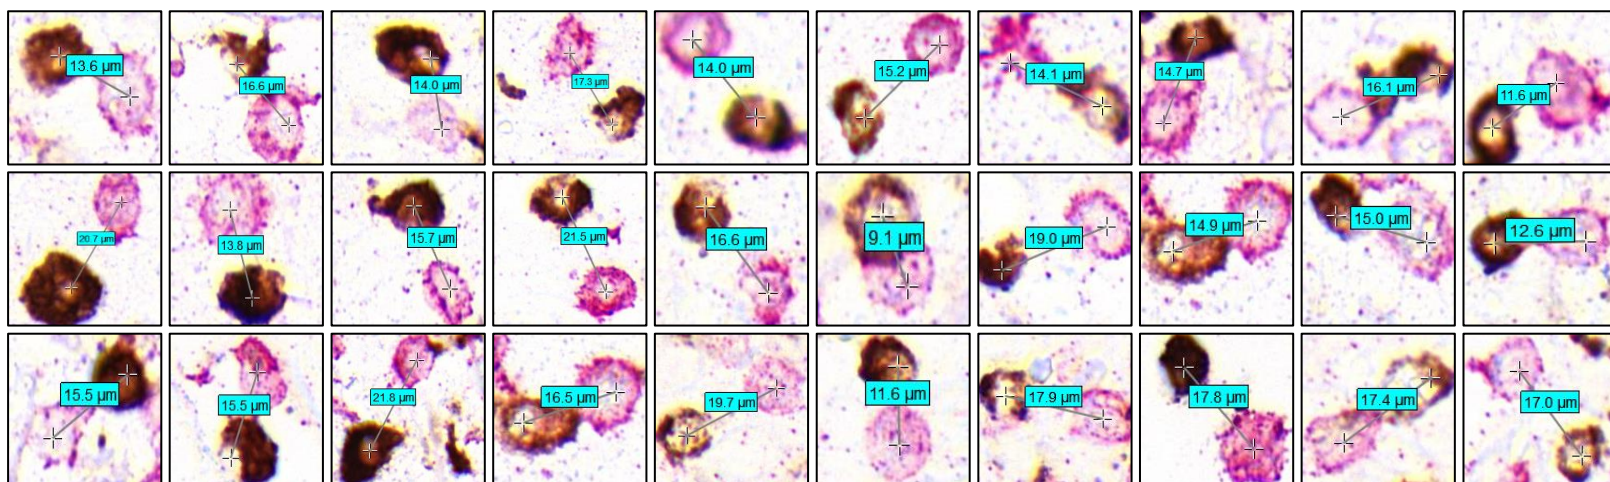

**Figure S1. NK-macrophage cell distance.** (A, B) The distance between decidual natural killer (NK) cells and macrophages in the decidua of normal pregnant women (A) or patients with recurrent spontaneous abortion (RSA) (B).



**A**

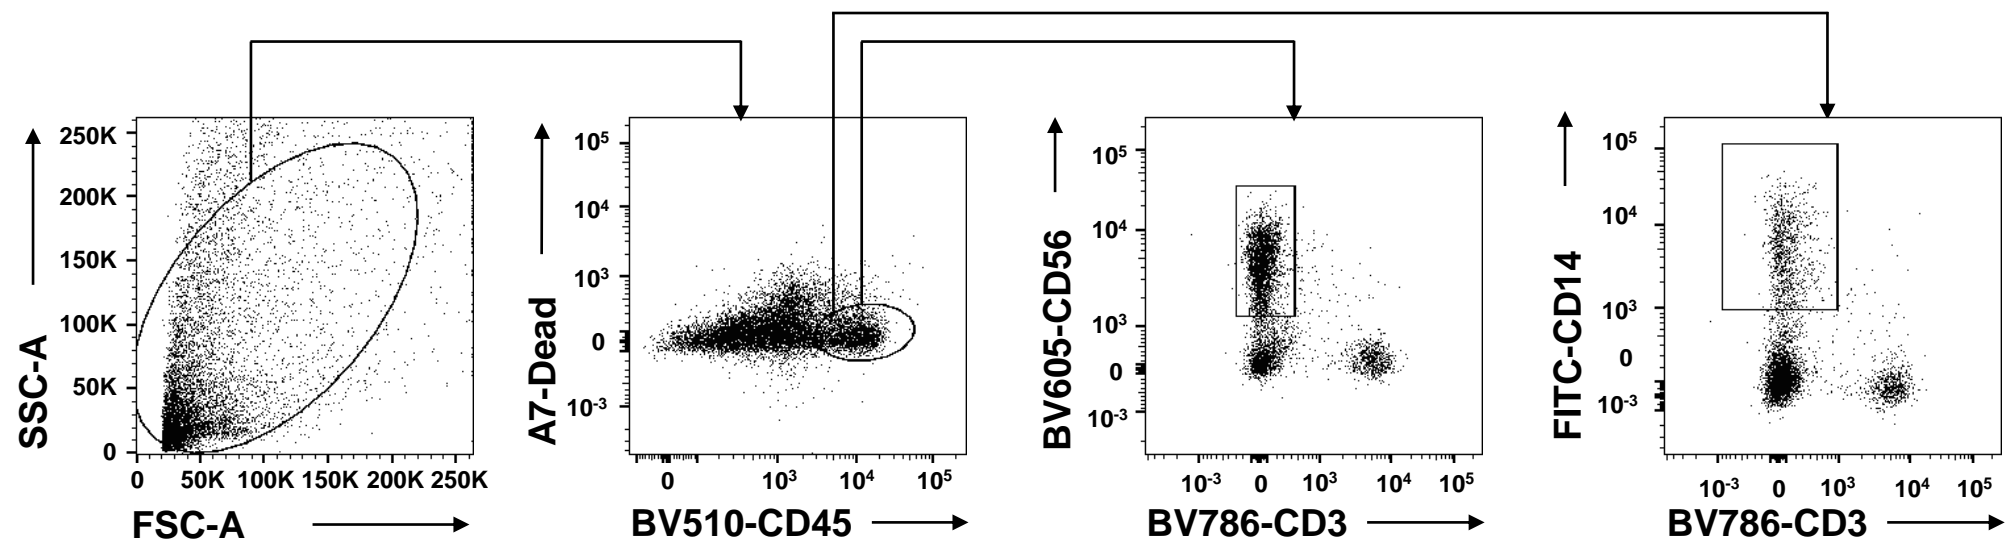

**Figure S2. The gating strategy for cell sorting.**
